# Supplementary material for: The transcription factor HIF2α partakes in the differentiation block of acute myeloid leukemia
Source: PubMed Central journal article supplement (PMC10630882; doi:10.15252/emmm.202317810), 2023-10-09
Supplement: EMMM-15-e17810-s006.pdf [file EMMM-15-e17810-s006.pdf]

## Table of contents to the appendix file

| <b>Contents</b>         | <b>Page</b> |
|-------------------------|-------------|
| Appendix Figure S1      | 2           |
| Appendix Figure S2      | 3           |
| Appendix Figure S3      | 4           |
| Appendix Figure S4      | 5           |
| Appendix Figure Legends | 6-8         |
| Appendix Table S1       | 9-12        |
| Appendix Table S2       | 13-15       |
| Appendix Table S3       | 16          |
| Appendix Table S4       | 17          |

## Appendix Figure S1

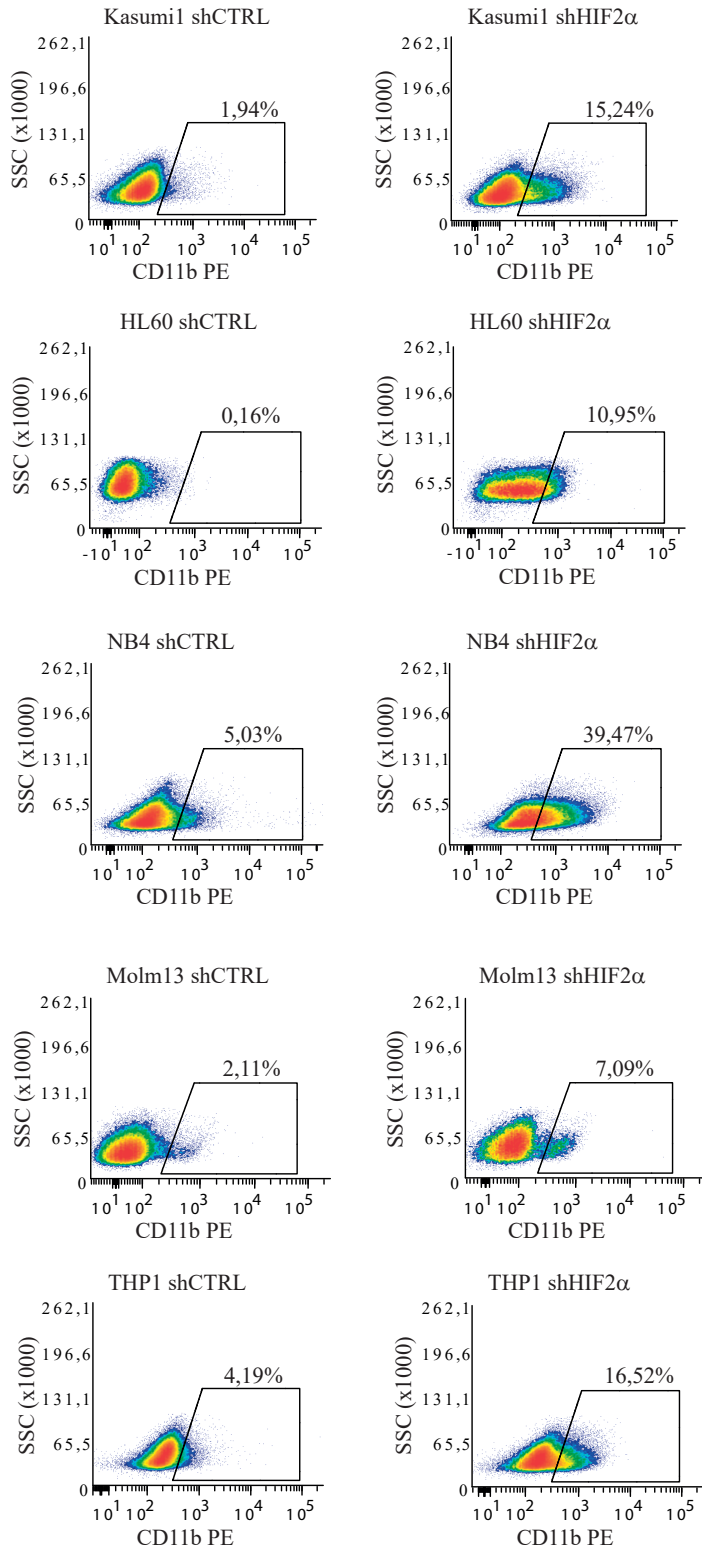

# Appendix Figure S2

**A**

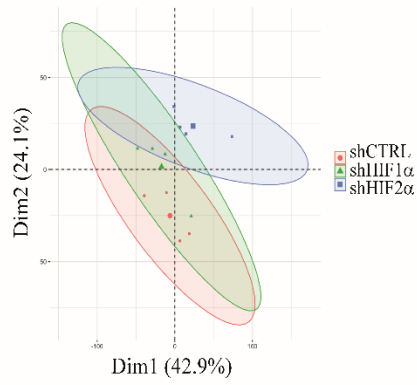

**B**

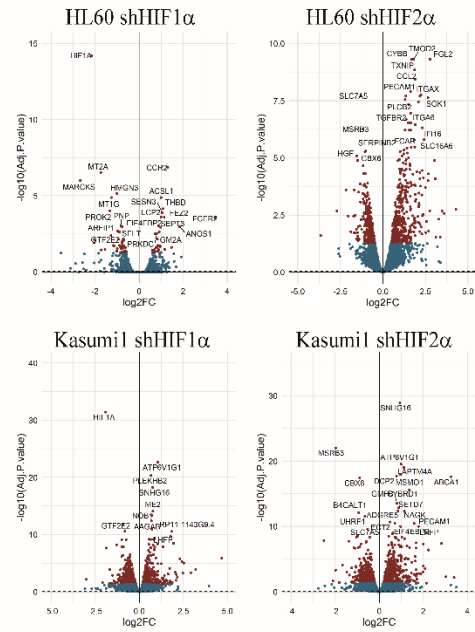

**C**

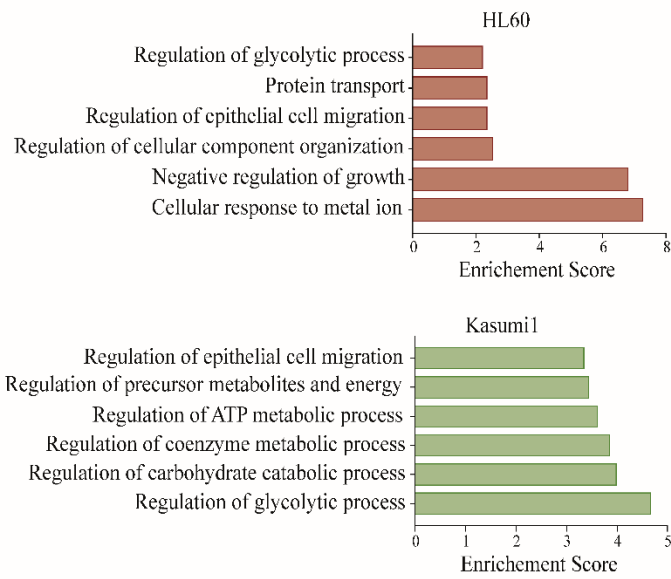

# Appendix Figure S3

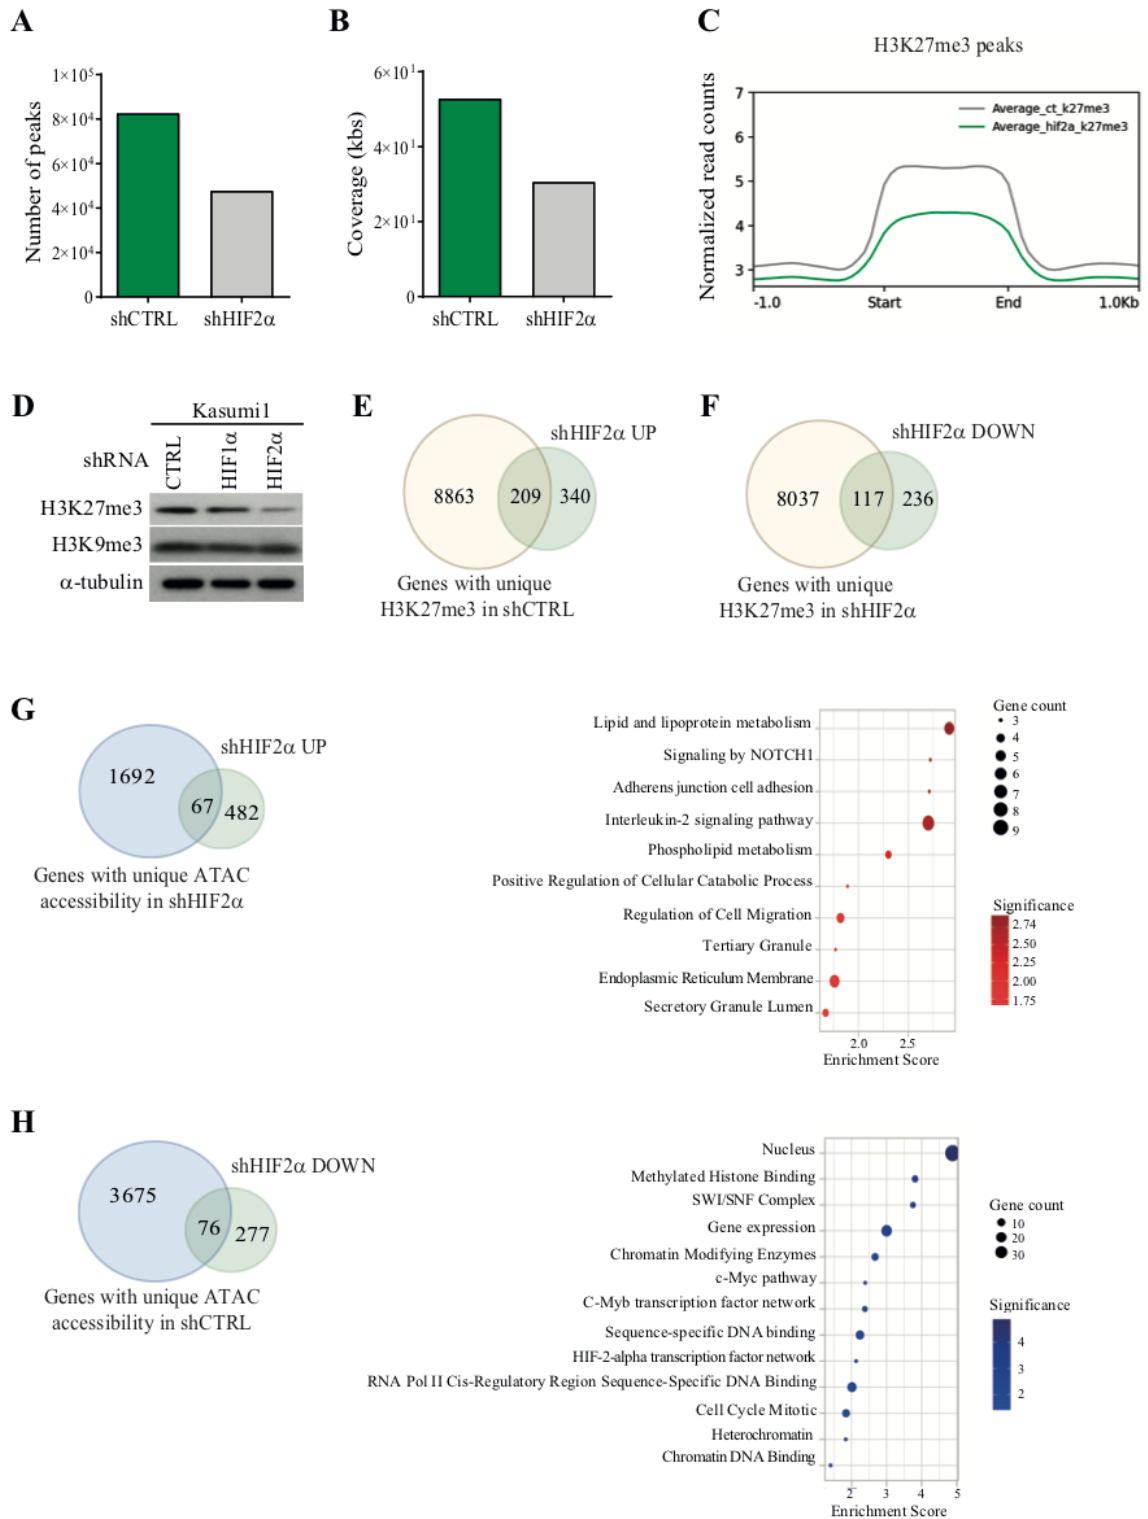

# Appendix Figure S4

**A**

| PDX    | Chromosomal abnormality | Main genetic lesions         | Immunophenotype                                          |
|--------|-------------------------|------------------------------|----------------------------------------------------------|
| AML-01 | Normal cytogenetic      | NPM1, DNMT3A, FLT3-ITD, IDH1 | CD4+/CD7+/CD11b+/CD11c+/CD13+/CD33+/CD38+/CD45RA+/CD117+ |
| AML-02 | Normal cytogenetic      | NPM1, DNMT3A, FLT3-ITD       | CD24+/CD7+/CD11b+/CD13+/CD33+/CD34+/CD38+/CD45RA+/CD117+ |

**B**

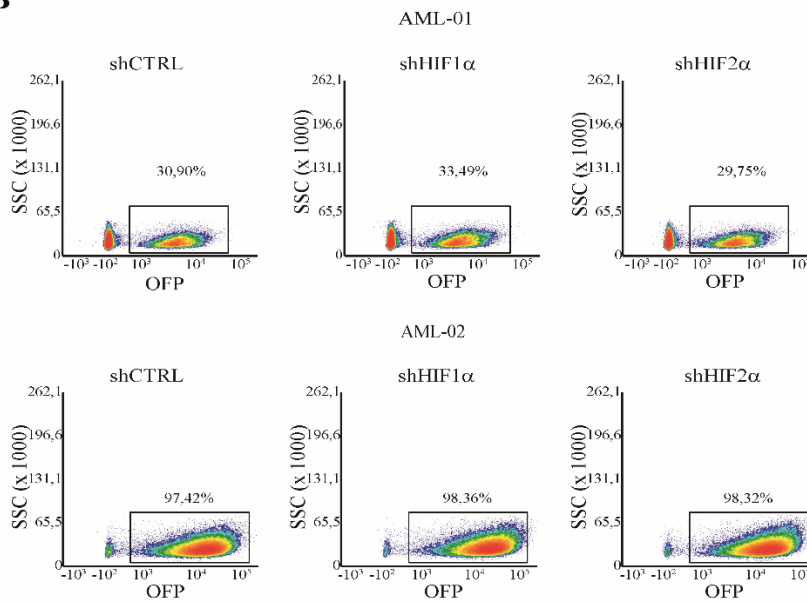

**C**

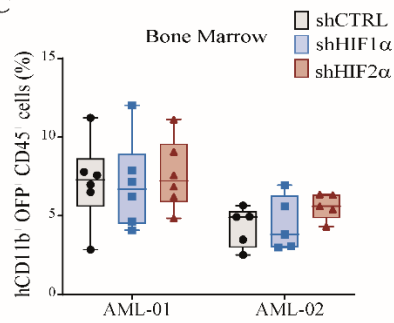

**D**

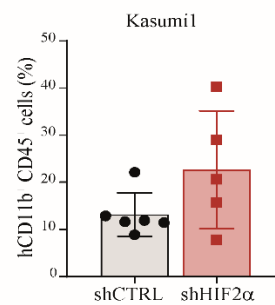

## Appendix Figure Legends

**Appendix Figure S1. Analysis of CD11b expression upon HIF2 $\alpha$  silencing in AML cell lines.** Representative flow cytometry profiles of CD11b and side scatter (SSC) in Kasumi1 and HL60 cell lines with control shRNA (shCTRL) or shRNA against HIF2 $\alpha$  (shHIF2 $\alpha$ ). Gates were set over PE isotype control antibody.

**Appendix Figure S2. Global changes in gene expression upon HIF1 $\alpha$  or HIF2 $\alpha$  silencing in AML cells.** **A.** Principal component analysis (PCA) on differentially expressed genes (DEGs) in shHIF1 $\alpha$ , shHIF2 $\alpha$ , and shCTRL HL60 and Kasumi1 cells. Ellipses identify clusters, the centroid represents the barycenter of the points belonging to the same cluster. **B.** Volcano plots depicting DEGs in shHIF1 $\alpha$  and shHIF2 $\alpha$  HL60 and Kasumi1 cells with respect to shCTRL cells. Red and blue dots correspond respectively to significantly and non-significantly deregulated genes. A significant threshold of 0.05, adjusting the p-value by FDR (False Discovery Rates), was established to identify DEGs. **C** Representative Gene Ontology (GO) terms within the most significant families of downregulated genes in shHIF1 $\alpha$  HL60 and Kasumi1 cells. Data are presented as Enrichment Score ( $-\log_{10}(\text{p-value})$ ) over shCTRL cells.

**Appendix Figure S3. Global changes in H3K27me3 and chromatin accessibility via ATAC-seq upon HIF2 $\alpha$  silencing in Kasumi1 cells.** **A, B.** Number and coverage in kilobases (kbs) of H3K27me3 peaks in shCTRL and shHIF2 $\alpha$  cells. **C.** H3K27me3 levels in peaks identified in shCTRL and shHIF2 $\alpha$  cells **D.** Immunoblot analysis of H3K27me3 and H3K9me3 in Kasumi1 cells carrying a scrambled shRNA as control (CTRL) or shRNAs against HIF1 $\alpha$  and HIF2 $\alpha$ .  $\alpha$ -tubulin was used as loading control. **E.** Overlap of genes linked to unique H3K27me3 peaks in shCTRL cells and genes upregulated (UP) upon HIF2 $\alpha$  silencing

(shHIF2 $\alpha$ ). **F.** Overlap of genes mapping to unique H3K27me3 peaks in shHIF2 $\alpha$  cells and genes downregulated (DOWN) upon HIF2 $\alpha$  silencing (shHIF2 $\alpha$ ). **G.** Overlap of genes mapping to unique ATAC peaks in HIF2 $\alpha$  silenced cells and genes upregulated (UP) upon HIF2 $\alpha$  silencing (shHIF2 $\alpha$ , left Venn diagram). Gene set enrichment analysis of genes regulated by HIF2 $\alpha$  and showing changes in chromatin accessibility upon HIF2 $\alpha$  silencing (right plot). **H.** Overlap of genes mapping to unique ATAC peaks in control cells and genes downregulated (DOWN) upon HIF2 $\alpha$  silencing (shHIF2 $\alpha$ , left Venn diagram). Gene set enrichment analysis of genes regulated by HIF2 $\alpha$  and showing changes in chromatin accessibility upon HIF2 $\alpha$  silencing (right plot). In **G** and **H**, the following libraries were used: gene ontology (GO) biological process, GO molecular function, GO cellular component, Bioplanet, Reactome, and Hallmarks of cancer. Dot sizes represent the number of genes in each term, and colors indicate Enrichment Scores expressed as  $-\log_{10}(\text{p-value})$ .

**Appendix Figure S4. Silencing of HIF $\alpha$  factors in PDX-derived AML cells.** **A.** Genetic and immunophenotypic features of the two AML PDX models utilized in this work. **B.** FACS analysis performed at 96 hours after infection of AML-01 and AML-02 cells with lentiviral vectors carrying specific shRNAs and orange fluorescent protein (OFP). Shown is the transduction efficiency in AML-01 and AML-02 cells. Data are representative of one out of three experiments with similar results. **C.** Percentage of leukemic cells expressing the myeloid differentiation marker CD11b (hCD11b<sup>+</sup>OFP<sup>+</sup>CD45<sup>+</sup>) in the bone marrow of AML-01 (n=6) and AML-02 (n=5) mice carrying shCTRL, shHIF1 $\alpha$ , or shHIF2 $\alpha$ . Data are shown in box and whisker plots where the central band denotes the median value, box contains interquartile ranges, while whiskers mark minimum and maximum values. All biological replicates are shown (n=5/6). **D.** Percentage of leukemic cells expressing the myeloid differentiation marker

CD11b (hCD11b<sup>+</sup>CD45<sup>+</sup>) in Kasumi1 cells carrying shCTRL (n=6) or shHIF2 $\alpha$  (n=5) injected subcutaneously.



**Appendix Table S1. List of 118 genes commonly upregulated upon HIF2 $\alpha$  silencing in HL60 and Kasumi1 cells.**

| Gene Symbol | HL60 Log <sub>2</sub> FC | HL60 padj | Kasumi1 Log <sub>2</sub> FC | Kasumi1 padj | Description                                         |
|-------------|--------------------------|-----------|-----------------------------|--------------|-----------------------------------------------------|
| ACSL4       | 0,73                     | 1,29E-02  | 0,52                        | 1,62E-05     | acyl-CoA synthetase long chain family member 4      |
| ADAP2       | 1,71                     | 8,41E-03  | 1,4                         | 5,32E-03     | ArfGAP with dual PH domains 2                       |
| ADGRE2      | 1,13                     | 1,92E-04  | 0,57                        | 2,24E-02     | adhesion G protein-coupled receptor E2              |
| AIF1        | 0,56                     | 4,90E-02  | 0,66                        | 7,32E-04     | allograft inflammatory factor 1                     |
| ALDH3A2     | 0,7                      | 1,10E-02  | 0,73                        | 4,38E-09     | aldehyde dehydrogenase 3 family member A2           |
| ANOS1       | 1,62                     | 1,35E-03  | 2,24                        | 4,10E-07     | anosmin 1                                           |
| ANXA5       | 0,65                     | 1,29E-02  | 0,38                        | 2,77E-02     | annexin A5                                          |
| APLP2       | 0,59                     | 7,18E-03  | 0,61                        | 4,17E-03     | amyloid beta precursor like protein 2               |
| APOL1       | 1,32                     | 1,64E-02  | 1                           | 2,54E-02     | apolipoprotein L1                                   |
| ASPH        | 1,04                     | 3,25E-05  | 0,99                        | 7,38E-06     | aspartate beta-hydroxylase                          |
| ATG9A       | 0,92                     | 4,19E-02  | 1,02                        | 3,43E-06     | autophagy related 9A                                |
| ATHL1       | 1,25                     | 5,83E-03  | 0,68                        | 3,51E-02     | protein-glucosylgalactosylhydroxylysine glucosidase |
| ATP6V1G1    | 0,84                     | 1,42E-03  | 0,98                        | 3,13E-20     | ATPase H <sup>+</sup> transporting V1 subunit G1    |
| CCR1        | 1,42                     | 1,31E-04  | 0,88                        | 2,28E-04     | C-C motif chemokine receptor 1                      |
| CCSER2      | 0,96                     | 2,17E-02  | 0,52                        | 3,95E-02     | coiled-coil serine rich protein 2                   |
| CD300C      | 0,99                     | 2,68E-02  | 0,61                        | 1,25E-02     | CD300c molecule                                     |
| CD4         | 0,65                     | 1,48E-02  | 0,35                        | 2,25E-02     | CD4 molecule                                        |
| CD53        | 1,04                     | 4,76E-05  | 0,78                        | 4,17E-03     | CD53 molecule                                       |
| CREB3L2     | 0,73                     | 3,73E-03  | 0,69                        | 8,09E-07     | cAMP responsive element binding protein 3 like 2    |
| CTSB        | 0,6                      | 2,89E-02  | 0,59                        | 4,32E-05     | cathepsin B                                         |
| CTSZ        | 1,02                     | 6,14E-04  | 0,83                        | 1,21E-04     | cathepsin Z                                         |
| CYB5R1      | 0,61                     | 4,92E-02  | 0,48                        | 1,50E-02     | cytochrome b5 reductase 1                           |
| CYBB        | 1,67                     | 4,90E-10  | 0,93                        | 4,57E-04     | cytochrome b-245, beta polypeptide                  |
| CYBRD1      | 0,79                     | 5,58E-03  | 1,37                        | 2,63E-16     | cytochrome b reductase 1                            |
| CYTH4       | 0,8                      | 3,74E-02  | 0,76                        | 2,17E-03     | cytohesin 4                                         |
| DCP2        | 0,75                     | 3,47E-03  | 0,79                        | 1,94E-18     | decapping mRNA 2                                    |
| DEF8        | 0,73                     | 2,80E-02  | 0,58                        | 2,25E-05     | differentially expressed in FDCP 8 homolog          |
| EID1        | 0,57                     | 1,59E-02  | 0,32                        | 1,63E-02     | EP300 interacting inhibitor of differentiation 1    |

|          |      |          |      |          |                                                               |
|----------|------|----------|------|----------|---------------------------------------------------------------|
| EIF4EBP2 | 1,02 | 5,20E-06 | 0,98 | 9,74E-11 | eukaryotic translation initiation factor 4E binding protein 2 |
| ENTPD5   | 0,83 | 3,84E-02 | 0,56 | 4,64E-02 | ectonucleoside triphosphate diphosphohydrolase 5              |
| EVI2A    | 1,51 | 1,00E-05 | 0,62 | 4,85E-02 | ecotropic viral integration site 2A                           |
| FADS1    | 0,63 | 8,16E-03 | 0,85 | 3,48E-04 | fatty acid desaturase 1                                       |
| FADS3    | 1,15 | 4,84E-02 | 1,11 | 3,77E-03 | fatty acid desaturase 3                                       |
| FAM135A  | 0,71 | 2,93E-02 | 0,38 | 3,87E-03 | family with sequence similarity 135 member A                  |
| FCAR     | 1,84 | 1,67E-06 | 1,25 | 4,94E-02 | Fc fragment of IgA receptor                                   |
| FEZ2     | 0,82 | 7,71E-03 | 1,03 | 4,50E-09 | fasciculation and elongation protein zeta 2                   |
| FGL2     | 2,78 | 4,90E-10 | 0,97 | 4,72E-02 | fibrinogen-like protein 2                                     |
| FNDC3A   | 0,81 | 4,08E-03 | 0,5  | 4,28E-03 | fibronectin type III domain containing 3A                     |
| FNDC3B   | 0,73 | 5,71E-03 | 0,5  | 1,82E-03 | fibronectin type III domain containing 3B                     |
| GAA      | 1,25 | 2,74E-03 | 0,78 | 7,33E-05 | alpha glucosidase                                             |
| GMFB     | 0,63 | 1,42E-02 | 0,81 | 3,16E-14 | glia maturation factor beta                                   |
| GNS      | 0,74 | 2,26E-03 | 0,54 | 1,24E-02 | glucosamine (N-acetyl)-6-sulfatase                            |
| GOLIM4   | 0,7  | 1,49E-02 | 0,44 | 9,84E-06 | golgi integral membrane protein 4                             |
| GPCPD1   | 0,91 | 4,92E-04 | 0,48 | 2,15E-02 | glycerophosphocholine phosphodiesterase 1                     |
| GPR137B  | 1,15 | 9,22E-03 | 1,09 | 5,36E-04 | G protein-coupled receptor 137B                               |
| H6PD     | 1,88 | 3,35E-06 | 1,64 | 1,97E-05 | hexose-6-phosphate dehydrogenase/glucose 1-dehydrogenase      |
| HEXB     | 0,65 | 1,85E-02 | 0,56 | 1,62E-02 | hexosaminidase subunit beta                                   |
| HLA-E    | 0,75 | 1,03E-02 | 0,29 | 3,38E-02 | major histocompatibility complex, class I, E                  |
| HNMT     | 0,77 | 1,93E-02 | 0,48 | 1,63E-02 | histamine N-methyltransferase                                 |
| ICAM1    | 3,11 | 2,90E-02 | 2,83 | 4,23E-08 | intercellular adhesion molecule 1                             |
| IDH1     | 0,57 | 9,15E-03 | 0,41 | 3,87E-03 | isocitrate dehydrogenase (NADP(+)) 1                          |
| IFI16    | 2,33 | 4,81E-07 | 1,01 | 2,33E-02 | interferon gamma inducible protein 16                         |
| IFNGR2   | 0,74 | 6,81E-03 | 0,58 | 2,55E-03 | interferon gamma receptor 2                                   |
| IGF2BP3  | 0,62 | 1,65E-02 | 0,41 | 4,13E-02 | insulin like growth factor 2 mRNA binding protein 3           |
| IL6ST    | 1,55 | 6,19E-07 | 0,74 | 6,07E-03 | interleukin 6 cytokine family signal transduce                |
| ITGAV    | 1,28 | 5,60E-05 | 0,75 | 2,78E-03 | integrin subunit alpha V                                      |
| ITGB2    | 0,73 | 1,56E-02 | 0,88 | 4,73E-02 | integrin subunit beta 2                                       |
| KIAA1191 | 0,58 | 3,45E-02 | 0,69 | 1,29E-05 | KIAA1191                                                      |
| KRCC1    | 1,15 | 7,21E-04 | 0,51 | 8,44E-03 | lysine rich coiled-coil 1                                     |

|         |      |          |      |          |                                                     |
|---------|------|----------|------|----------|-----------------------------------------------------|
| LAIR1   | 0,67 | 1,68E-02 | 0,7  | 6,76E-08 | leukocyte associated immunoglobulin like receptor 1 |
| LAPTM4A | 1,01 | 3,15E-04 | 1,12 | 9,91E-20 | lysosomal protein transmembrane 4 alpha             |
| LCP2    | 0,77 | 3,03E-03 | 0,98 | 1,97E-05 | lymphocyte cytosolic protein 2                      |
| LEPROT  | 1,07 | 9,59E-04 | 0,55 | 6,82E-03 | leptin receptor overlapping transcript              |
| LRP1    | 2,68 | 5,09E-05 | 1,64 | 2,62E-02 | LDL receptor related protein 1                      |
| MAGEF1  | 1,01 | 3,90E-02 | 0,92 | 2,79E-02 | MAGE family member F1                               |
| MANBA   | 1,07 | 3,46E-04 | 0,54 | 8,99E-04 | mannosidase beta                                    |
| MFSD6   | 1,44 | 8,60E-04 | 0,79 | 3,21E-02 | major facilitator superfamily domain containing 6   |
| MILR1   | 1,5  | 2,43E-02 | 1,08 | 5,84E-03 | mast cell immunoglobulin like receptor 1            |
| MR1     | 1,06 | 4,46E-04 | 0,73 | 2,81E-04 | major histocompatibility complex, class I-related   |
| MYD88   | 0,73 | 6,19E-03 | 0,56 | 3,87E-02 | MYD88 innate immune signal transduction adaptor     |
| MYO1C   | 0,87 | 3,02E-02 | 0,78 | 5,09E-04 | myosin IC                                           |
| NAGK    | 0,98 | 7,35E-03 | 1,14 | 5,41E-13 | N-acetylglucosamine kinase                          |
| NCF1B   | 1,76 | 3,37E-03 | 1,58 | 2,13E-03 | neutrophil cytosolic factor 1B pseudogene           |
| NHLRC3  | 1    | 5,07E-04 | 0,71 | 2,33E-04 | NHL repeat containing 3                             |
| NRP1    | 1,37 | 3,15E-05 | 0,69 | 1,87E-02 | neuropilin 1                                        |
| PAFAH2  | 0,83 | 3,32E-02 | 0,66 | 4,40E-02 | platelet activating factor acetylhydrolase 2        |
| PECAM1  | 1,64 | 1,28E-08 | 1,59 | 3,85E-11 | platelet and endothelial cell adhesion molecule 1   |
| PKN2    | 0,76 | 2,34E-02 | 0,44 | 4,27E-02 | protein kinase N2                                   |
| POLR3GL | 0,73 | 1,80E-02 | 0,51 | 8,89E-03 | RNA polymerase III subunit GL                       |
| PON2    | 0,6  | 1,88E-02 | 0,36 | 4,97E-02 | paraoxonase 2                                       |
| PPIC    | 1,14 | 1,64E-04 | 0,71 | 2,53E-05 | peptidylprolyl isomerase C                          |
| PRKCA   | 0,98 | 1,20E-05 | 0,52 | 4,28E-03 | protein kinase C alpha                              |
| PTTG1IP | 0,53 | 4,49E-02 | 0,66 | 2,93E-04 | PTTG1 interacting protein                           |
| RAB31   | 1,01 | 6,42E-04 | 0,65 | 3,06E-02 | RAB31, member RAS oncogene family                   |
| RASSF2  | 0,65 | 5,03E-03 | 0,45 | 7,52E-03 | Ras association domain family member 2              |
| RDX     | 0,6  | 4,00E-02 | 0,53 | 3,10E-04 | radixin                                             |
| RHOU    | 1,01 | 4,92E-04 | 0,61 | 7,06E-03 | ras homolog family member U                         |
| RRAGD   | 0,54 | 4,42E-02 | 0,63 | 1,57E-03 | Ras related GTP binding D                           |
| SCARB2  | 0,62 | 1,48E-02 | 0,67 | 3,40E-02 | scavenger receptor class B member 2                 |
| SEC23A  | 0,66 | 2,67E-02 | 0,44 | 2,21E-02 | SEC23 homolog A, COPII coat complex component       |
| SERINC3 | 0,55 | 2,94E-02 | 0,42 | 6,60E-05 | serine incorporator 3                               |

|           |      |          |      |          |                                                           |
|-----------|------|----------|------|----------|-----------------------------------------------------------|
| SETD7     | 0,91 | 1,62E-04 | 0,89 | 1,52E-13 | SET domain containing 7, histone lysine methyltransferase |
| SGK3      | 1,04 | 6,88E-04 | 0,9  | 6,76E-08 | serum/glucocorticoid regulated kinase family member 3     |
| SGMS2     | 1,22 | 1,37E-02 | 0,95 | 4,71E-02 | sphingomyelin synthase 2                                  |
| SIGLEC14  | 1,35 | 9,71E-05 | 0,71 | 3,38E-02 | sialic acid binding Ig like lectin 14                     |
| SIGLEC7   | 0,8  | 1,85E-02 | 0,63 | 1,02E-03 | sialic acid binding Ig like lectin 7                      |
| SIGLEC9   | 1,64 | 3,80E-02 | 1,68 | 1,97E-03 | sialic acid binding Ig like lectin 9                      |
| SKAP2     | 1,1  | 3,05E-05 | 0,57 | 4,18E-08 | src kinase associated phosphoprotein 2                    |
| SLC2A6    | 1,32 | 3,41E-02 | 0,87 | 2,73E-03 | solute carrier family 2 member 6                          |
| SLC30A1   | 0,63 | 3,53E-02 | 0,55 | 4,91E-02 | solute carrier family 30 member 1                         |
| SMPD1     | 1,24 | 4,71E-03 | 1,04 | 5,92E-04 | sphingomyelin phosphodiesterase 1                         |
| SNN       | 0,91 | 8,84E-03 | 0,57 | 2,45E-02 | stannin                                                   |
| SNX30     | 0,83 | 3,34E-02 | 0,55 | 2,33E-03 | sorting nexin family member 30                            |
| SORT1     | 1,62 | 4,92E-04 | 0,89 | 1,37E-02 | sortilin 1                                                |
| TGFBR2    | 1,38 | 2,07E-07 | 0,9  | 2,95E-06 | transforming growth factor beta receptor 2                |
| THBD      | 0,82 | 2,37E-03 | 0,95 | 1,42E-03 | thrombomodulin                                            |
| THEMIS2   | 0,99 | 9,04E-04 | 0,61 | 2,63E-02 | thymocyte selection associated family member 2            |
| TM6SF1    | 2,07 | 6,53E-03 | 1,99 | 9,11E-04 | transmembrane 6 superfamily member 1                      |
| TMEM30A   | 0,55 | 3,90E-02 | 0,31 | 3,40E-02 | transmembrane protein 30A                                 |
| TNFRSF10B | 0,92 | 6,67E-04 | 0,96 | 2,39E-06 | TNF receptor superfamily member 10b                       |
| TWF1      | 0,78 | 2,34E-03 | 0,96 | 1,06E-07 | twinfilin actin binding protein 1                         |
| UBA7      | 1,21 | 7,43E-03 | 0,61 | 2,88E-02 | ubiquitin like modifier activating enzyme 7               |
| UBASH3B   | 1,04 | 1,34E-04 | 0,43 | 3,28E-02 | ubiquitin associated and SH3 domain containing B          |
| USP3      | 0,62 | 2,70E-02 | 0,54 | 5,32E-03 | ubiquitin specific peptidase 3                            |
| VSIR      | 0,86 | 6,62E-03 | 0,8  | 4,52E-03 | V-set immunoregulatory receptor                           |
| WDR11     | 0,65 | 2,94E-02 | 0,27 | 4,38E-02 | WD repeat domain 11                                       |
| YPEL5     | 1,4  | 8,52E-04 | 0,92 | 1,20E-02 | yippee like 5                                             |
| ZNF367    | 0,63 | 1,37E-02 | 0,87 | 1,36E-08 | zinc finger protein 367                                   |

**Appendix Table S2. List of 74 genes commonly downregulated upon HIF2 $\alpha$  silencing in HL60 and Kasumi1 cells.**

| Gene Symbol | HL60 Log <sub>2</sub> FC | HL60 padj | Kasumi1 Log <sub>2</sub> FC | Kasumi1 padj | Description                                              |
|-------------|--------------------------|-----------|-----------------------------|--------------|----------------------------------------------------------|
| ABT1        | -0,71                    | 8,97E-03  | -0,43                       | 1,26E-02     | activator of basal transcription 1                       |
| APBA2       | -0,86                    | 7,39E-03  | -0,51                       | 1,68E-02     | amyloid beta precursor protein binding family A member 2 |
| ASB6        | -0,62                    | 3,34E-02  | -0,35                       | 1,26E-02     | ankyrin repeat and SOCS box containing 6                 |
| ASIC1       | -0,74                    | 4,16E-02  | -0,53                       | 4,91E-02     | acid sensing ion channel subunit 1                       |
| BCL11A      | -0,81                    | 4,99E-02  | -1,35                       | 2,91E-03     | BAF chromatin remodeling complex subunit BCL11A          |
| CALR        | -0,68                    | 4,39E-03  | -0,23                       | 2,54E-02     | calreticulin                                             |
| CBX6        | -1,04                    | 5,47E-06  | -0,88                       | 3,89E-18     | chromobox 6                                              |
| CDK6        | -0,69                    | 2,70E-02  | -0,66                       | 1,78E-03     | cyclin dependent kinase 6                                |
| CHERP       | -0,58                    | 2,93E-02  | -0,36                       | 8,19E-04     | calcium homeostasis endoplasmic reticulum protein        |
| CLUH        | -0,65                    | 6,86E-03  | -0,28                       | 9,22E-04     | clustered mitochondria homolog                           |
| COL27A1     | -1,05                    | 1,67E-02  | -1,37                       | 1,91E-08     | collagen type XXVII alpha 1 chain                        |
| CSK         | -0,81                    | 1,58E-03  | -0,36                       | 4,38E-02     | C-terminal Src kinase                                    |
| DDX54       | -0,74                    | 3,52E-03  | -0,33                       | 1,31E-02     | DEAD-box helicase 54                                     |
| DHX37       | -0,89                    | 3,47E-04  | -0,25                       | 2,44E-02     | DEAD-box helicase 37                                     |
| DLX2        | -0,94                    | 3,75E-02  | -0,85                       | 1,23E-03     | distal-less homeobox 2                                   |
| EIF1AX      | -0,55                    | 3,34E-02  | -0,5                        | 2,91E-05     | eukaryotic translation initiation factor 1A X-linked     |
| FAM216A     | -0,66                    | 1,34E-02  | -0,6                        | 6,15E-05     | family with sequence similarity 216 member A             |
| FBRSL1      | -0,89                    | 4,42E-04  | -0,57                       | 1,59E-04     | fibrosin like 1                                          |
| FHOD1       | -0,55                    | 3,93E-02  | -0,36                       | 2,78E-03     | formin homology 2 domain containing 1                    |
| FLT3        | -0,74                    | 3,80E-02  | -0,84                       | 1,62E-03     | fms related receptor tyrosine kinase 3                   |
| GEMIN4      | -0,81                    | 6,39E-04  | -0,51                       | 1,58E-04     | gem nuclear organelle associated protein 4               |
| HDLBP       | -0,49                    | 3,78E-02  | -0,42                       | 4,50E-09     | high density lipoprotein binding protein                 |
| HIVEP2      | -1,07                    | 3,25E-02  | -1                          | 1,78E-02     | HIVEP zinc finger 2                                      |
| HSPB1       | -0,93                    | 1,33E-03  | -0,32                       | 4,43E-02     | heat shock protein family B (small) member 1             |
| IRF2BP1     | -0,7                     | 2,86E-02  | -0,39                       | 4,47E-02     | interferon regulatory factor 2 binding protein 1         |
| KIF21B      | -0,66                    | 1,12E-02  | -0,49                       | 3,51E-02     | kinesin family member 21B                                |

|               |       |          |       |          |                                                                  |
|---------------|-------|----------|-------|----------|------------------------------------------------------------------|
| LGR4          | -0,83 | 3,26E-02 | -0,75 | 1,25E-04 | leucine rich repeat containing G protein-coupled receptor 4      |
| LMNB2         | -0,81 | 1,22E-03 | -0,28 | 2,91E-03 | lamin B2                                                         |
| LPCAT1        | -0,59 | 7,42E-03 | -0,36 | 2,85E-04 | lysophosphatidylcholine acyltransferase 1                        |
| LRP3          | -1,02 | 1,08E-03 | -0,71 | 4,51E-02 | LDL receptor related protein 3                                   |
| LRRC47        | -0,57 | 3,56E-02 | -0,35 | 2,32E-02 | leucine rich repeat containing 47                                |
| LZTS2         | -0,6  | 3,80E-02 | -0,71 | 6,44E-06 | leucine zipper tumor suppressor 2                                |
| MED24         | -0,58 | 2,13E-02 | -0,27 | 4,51E-02 | mediator complex subunit 24                                      |
| MPO           | -1,69 | 1,85E-02 | -1,47 | 9,60E-04 | myeloperoxidase                                                  |
| MRM1          | -0,79 | 1,57E-02 | -0,51 | 7,38E-03 | mitochondrial rRNA methyltransferase 1                           |
| MSRB3         | -1,16 | 5,42E-07 | -1,97 | 9,89E-23 | methionine sulfoxide reductase B3                                |
| MYBBP1A       | -0,66 | 4,46E-03 | -0,24 | 3,76E-02 | MYB binding protein 1a                                           |
| NFKBIB        | -0,71 | 1,33E-02 | -0,36 | 4,81E-02 | NFKB inhibitor beta                                              |
| NUDT15        | -0,75 | 1,80E-02 | -0,82 | 5,17E-08 | nudix hydrolase 15                                               |
| P3H3          | -0,85 | 2,91E-02 | -0,68 | 3,67E-02 | prolyl 3-hydroxylase 3                                           |
| PPP2R2D       | -0,64 | 2,76E-02 | -0,55 | 2,85E-04 | protein phosphatase 2 regulatory subunit Bdelta                  |
| PRR22         | -1,51 | 3,67E-02 | -0,76 | 2,02E-02 | proline rich 22                                                  |
| PRRT4         | -0,98 | 5,15E-04 | -0,89 | 1,81E-02 | proline rich transmembrane protein 4                             |
| PSMD3         | -0,78 | 9,36E-04 | -0,51 | 4,11E-07 | proteasome 26S subunit, non-ATPase 3                             |
| PUS1          | -0,74 | 6,10E-03 | -0,38 | 5,35E-03 | pseudouridine synthase 1                                         |
| RAC3          | -1,33 | 1,44E-04 | -0,88 | 1,36E-07 | Rac family small GTPase 3                                        |
| RANGAP1       | -0,65 | 9,09E-03 | -0,2  | 3,40E-02 | Ran GTPase activating protein 1                                  |
| RASGRP2       | -0,67 | 2,57E-02 | -0,52 | 9,56E-03 | RAS guanyl releasing protein 2                                   |
| REXO4         | -0,69 | 4,02E-03 | -0,58 | 2,70E-08 | REX4 homolog, 3'-5' exonuclease                                  |
| RGS18         | -0,76 | 1,01E-02 | -0,79 | 1,93E-02 | regulator of G protein signaling 18                              |
| RHOT2         | -0,76 | 3,59E-03 | -0,22 | 4,05E-02 | ras homolog family member T2                                     |
| RNF216P1      | -0,86 | 2,09E-03 | -0,74 | 3,44E-03 | ring finger protein 216 pseudogene 1                             |
| RP11-498C9.15 | -0,89 | 2,02E-03 | -1,18 | 6,39E-03 | pre-mRNA processing factor 31                                    |
| RPIA          | -0,51 | 3,85E-02 | -0,26 | 4,16E-02 | ribose 5-phosphate isomerase A                                   |
| RUNX2         | -0,79 | 4,90E-01 | -1,25 | 3,52E-06 | Runt-Related Transcription Factor 2                              |
| SART1         | -0,63 | 2,06E-02 | -0,33 | 3,09E-02 | spliceosome associated factor 1, recruiter of U4/U6.U5 tri-snRNP |
| SERPINB10     | -1,14 | 4,76E-05 | -1,66 | 7,97E-05 | serpin family B member 10                                        |
| SERPINB2      | -1,01 | 5,09E-06 | -2,51 | 1,51E-08 | serpin family B member 2                                         |

|          |       |          |       |          |                                                           |
|----------|-------|----------|-------|----------|-----------------------------------------------------------|
| SIRT7    | -0,57 | 3,15E-02 | -0,41 | 6,07E-03 | sirtuin 7                                                 |
| SLC7A5   | -1,29 | 1,94E-08 | -0,52 | 2,63E-10 | solute carrier family 7 member 5                          |
| SMPD4    | -0,7  | 6,42E-03 | -0,27 | 4,65E-02 | sphingomyelin phosphodiesterase 4                         |
| TBC1D2B  | -0,54 | 4,50E-02 | -0,55 | 2,80E-05 | TBC1 domain family member 2B                              |
| TCOF1    | -0,73 | 2,43E-03 | -0,25 | 1,58E-02 | treacle ribosome biogenesis factor 1                      |
| TELO2    | -1,07 | 1,56E-04 | -0,4  | 8,69E-06 | telomere maintenance 2                                    |
| TMTC2    | -0,73 | 3,98E-02 | -0,75 | 1,26E-03 | transmembrane O-mannosyltransferase targeting cadherins 2 |
| TNKS1BP1 | -0,75 | 2,89E-02 | -0,68 | 2,67E-04 | tankyrase 1 binding protein 1                             |
| TONSL    | -0,93 | 1,79E-03 | -0,4  | 4,01E-03 | tonsoku like, DNA repair protein                          |
| TRIM28   | -0,72 | 2,43E-03 | -0,27 | 5,65E-03 | tripartite motif containing 28                            |
| TUSC2    | -0,54 | 4,74E-02 | -0,46 | 1,17E-02 | tumor suppressor 2, mitochondrial calcium regulator       |
| UHRF1    | -0,86 | 4,77E-03 | -0,64 | 3,04E-12 | ubiquitin like with PHD and ring finger domains 1         |
| VIT      | -0,65 | 3,32E-02 | -0,77 | 2,80E-02 | vitrin                                                    |
| WDR18    | -1,08 | 4,11E-04 | -0,29 | 1,57E-02 | WD repeat domain 18                                       |
| WDR4     | -0,83 | 5,55E-03 | -0,52 | 2,54E-02 | WD repeat domain 4                                        |
| ZFP37    | -1,49 | 3,56E-02 | -1,25 | 2,96E-02 | ZFP37 zinc finger protein                                 |

**Appendix Table S3. Probes for qPCR.**

| Gene   | Assay ID      |
|--------|---------------|
| EPAS1  | Hs01026142_m1 |
| HIF1A  | Hs00936371_m1 |
| FLT3   | Hs00174690_m1 |
| CDK6   | Hs01026371_m1 |
| TRIM28 | Hs00232212_m1 |
| BCL11A | Hs01093197_m1 |
| RUNX2  | Hs01047973_m1 |
| UHRF1  | Hs01086727_m1 |
| PGK1   | Hs00943178_g1 |
| PDK1   | Hs01561847_m1 |
| ITGAM  | Hs00167304_m1 |
| ITGB2  | Hs00164957_m1 |
| CD53   | Hs00174065_m1 |
| IFI16  | Hs00986757_m1 |
| 18s    | Hs03003631_g1 |



**Appendix Table S4. Sequences of primers for ChIP experiments.**

| Primers               | Sequence (5'-3')       |
|-----------------------|------------------------|
| BCL11A forward        | AAAGGTGCGTGCTGTCTCAA   |
| BCL11A reverse        | AACCCTCATCCCATCTGGAAC  |
| HIF2 $\alpha$ forward | CCCCAACCCCTTTCTGTGTAC  |
| HIF2 $\alpha$ reverse | GGACCCATGAGTTTCACAGG   |
| RAR $\beta$ forward   | TCCTGGGAGTTGGTGATGTCAG |
| RAR $\beta$ reverse   | AAACCCTGCTCGGATCGCTC   |
| RUNX2 forward         | TCTTTATTGTAAAGGCCGCCA  |
| RUNX2 reverse         | CATGAAAGTGTTAGTCTGGGCA |
| SLC7A5 forward        | TGGCATGACAGTAGGGTTGT   |
| SLC7A5 reverse        | GAATTTCCAGTACACGCTGCC  |
